# Supplementary material for: Construction of a PCN/Fe2O3/CdS double Z-type heterojunction photocatalyst and its application in the oxidative coupling reaction of benzylamine
Source: Royal Society of Chemistry journal article supplement (doi:10.1039/d1dt01459e), 2021-01-01
Supplement: d1dt01459e1.pdf [file d1dt01459e1.pdf]

## Supporting Information

# Construction of PCN/Fe<sub>2</sub>O<sub>3</sub>/CdS double Z-type heterojunction photocatalyst and its application in the oxidative coupling reaction of benzylamine

Zhuhan Wang<sup>a</sup>, Yefeng Chen<sup>a</sup>, Mengyun Yin<sup>a</sup>, Qin Yang<sup>a</sup>, Yafen Zhou<sup>a</sup>, Li Qin<sup>a, \*</sup>, Kaiming Zhang<sup>b</sup> and Limei Zhou<sup>a, \*</sup>

<sup>a</sup> Chemical Synthesis and Pollution Control Key Laboratory of Sichuan Province, China West Normal University, Nanchong 637002, Sichuan, China.

<sup>b</sup> Key Laboratory of Green Chemistry of Sichuan Institutes of Higher Education, Sichuan University of Science & Engineering, Zigong 643000, Sichuan, China.

Corresponding Author: \*Tel: +86-817-2568081. E-mail: [cwnuzhoulimei@163.com](mailto:cwnuzhoulimei@163.com).

## 1. Materials

Melamine (TCI, >98%), ferric nitrate nine hydrate ( $\text{Fe}(\text{NO}_3)_3 \cdot 9\text{H}_2\text{O}$ , ACS, 98-101%), ethanol (KESHI, AR), cadmium acetate dihydrate ( $\text{Cd}(\text{CH}_3\text{COO})_2 \cdot 2\text{H}_2\text{O}$ , General-reagent, AR), thioacetamide (TAA, J.T.Baker, AR), ethylenediamine (EDA, General-reagent, AR), acetonitrile (KESHI, AR), benzylamine (Adamas-beta, 98%), 4-chlorobenzylamine (Adamas-beta, 98%), 4-methoxybenzylamine (Adamas-beta, 98%), 2-thiophenemethylamine (Adamas-beta, 97%+), 2-pyridinemethanamine (Adamas-beta, 99%), furfurylamine (Adamas-beta, 99%), 3-methoxybenzylamine (Adamas-beta, 98%), 2-methoxybenzylamine (Adamas-beta, 98%), 4-methoxybenzylamine (Adamas-beta, 98%), potassium iodide (KI, General-reagent, AR), p-benzoquinone (BQ, Adamas-beta, 99%), isopropanol (IPA, General-reagent, AR), silver nitrate ( $\text{AgNO}_3$ , ACS, >99%). All reagents were used without further purification.

## 2. Preparation of porous $\text{g-C}_3\text{N}_4$ (PCN)

Typically, 5 g of melamine was calcined at a heating rate of  $5\text{ }^\circ\text{C min}^{-1}$  increased to  $300\text{ }^\circ\text{C}$  under nitrogen atmosphere, and then the nitrogen flow was immediately stopped. The heating rate was constant, and the temperature continued to rise to  $550\text{ }^\circ\text{C}$  for 4 hours. The product of the collection was porous  $\text{g-C}_3\text{N}_4$  (PCN). Through the same calcination method,  $\text{g-C}_3\text{N}_4$  (CN) was prepared without stopping the nitrogen gas.

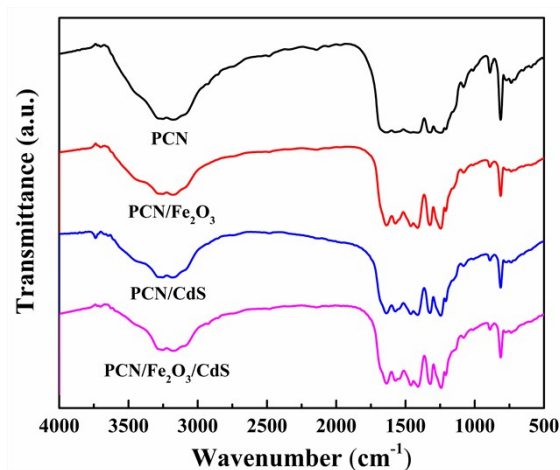

**Fig. S1.** FT-IR spectrum of samples.

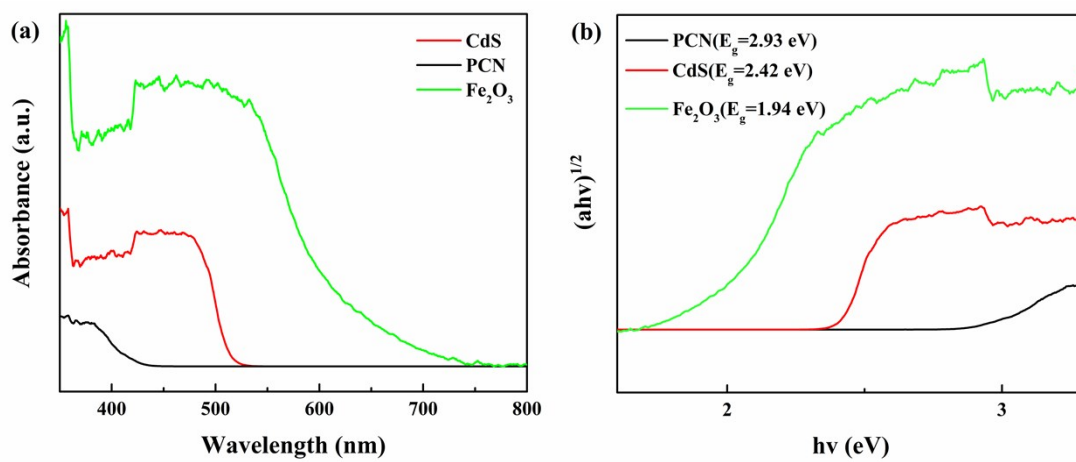

**Fig. S2.** UV-Vis diffuse reflectance absorption spectrum of PCN, Fe<sub>2</sub>O<sub>3</sub> and CdS (a). Band gap energy of PCN, Fe<sub>2</sub>O<sub>3</sub> and CdS (b).
